# Supplementary material
Source: PubMed Central journal article supplement (PMC4136619)
Supplement: 1412839111_pnas.1412839111.sd04.pdf [file 1412839111_pnas.1412839111.sd04.pdf]

Multicomponent Plot

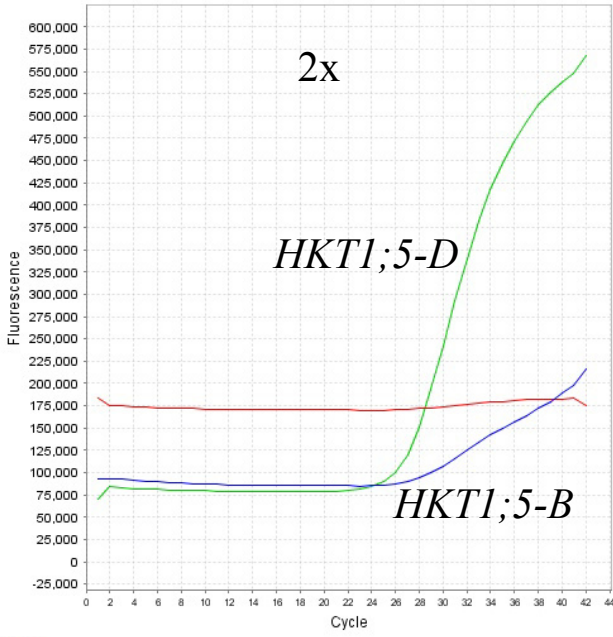

Multicomponent Plot

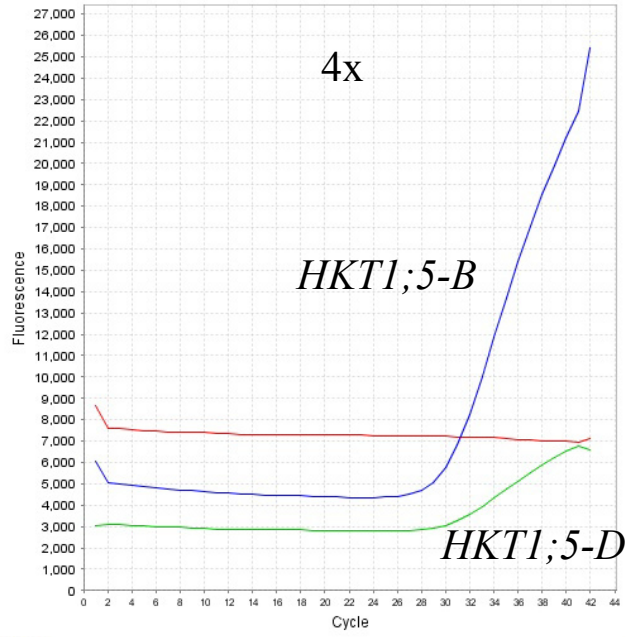

Multicomponent Plot

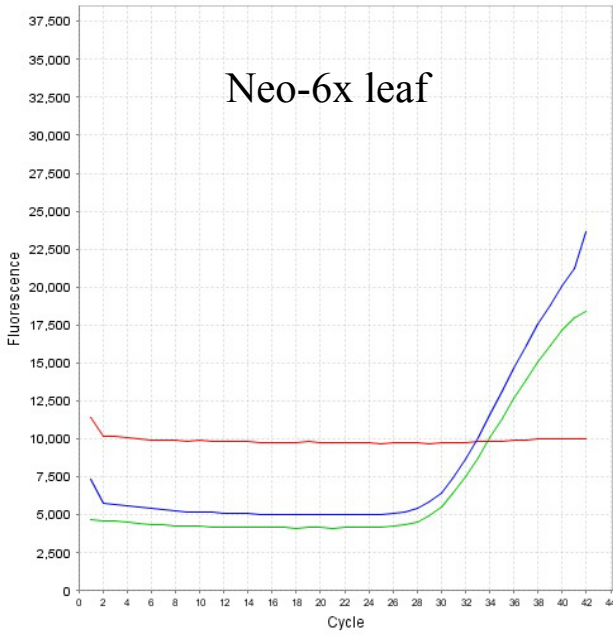

Multicomponent Plot

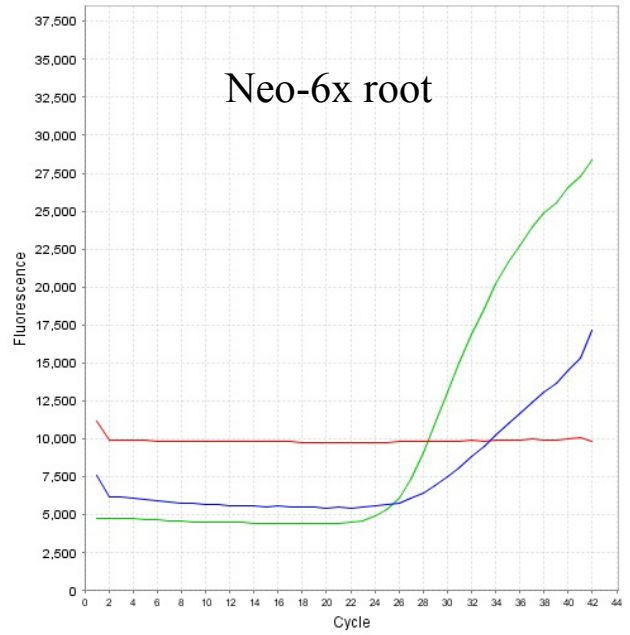

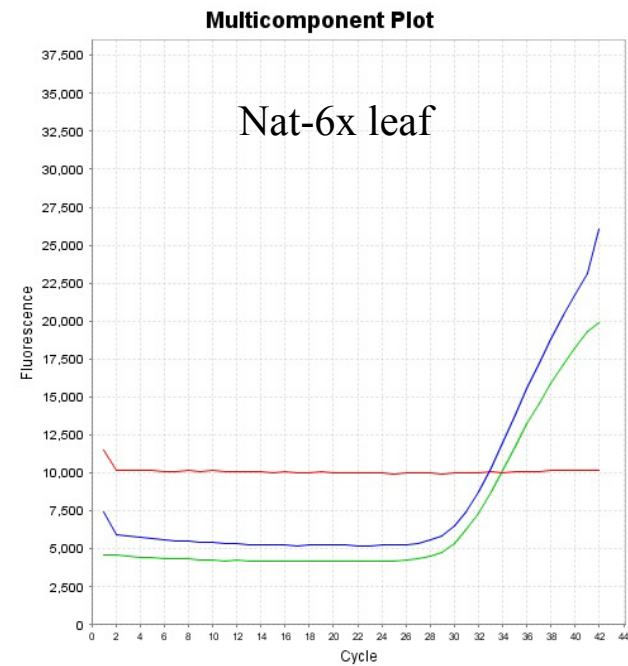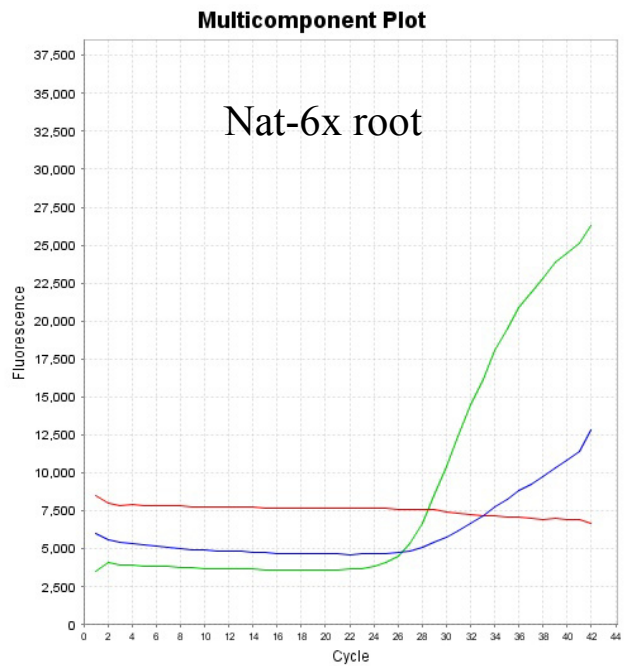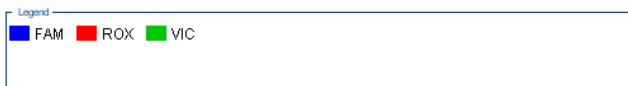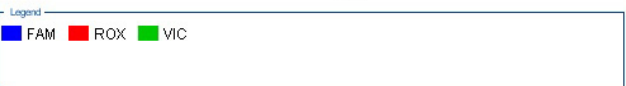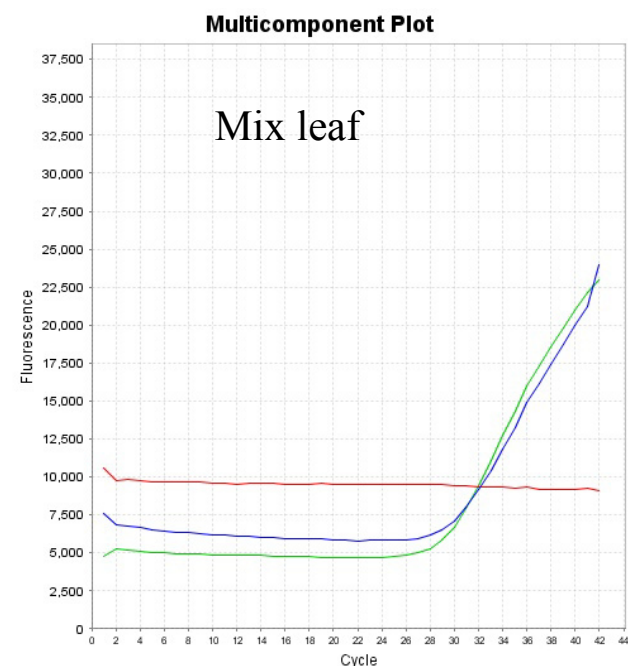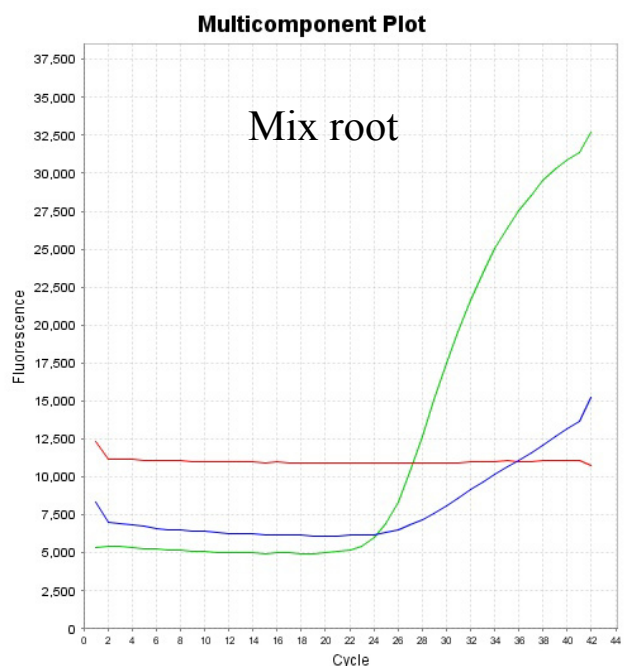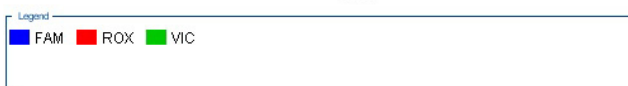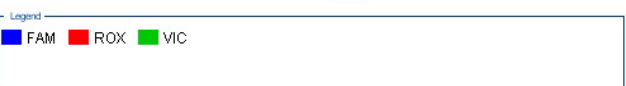

**Dataset S4** Examples of PCR amplification curve of the TaqMan® SNP Genotyping Assay used to measure relative expression levels of *HKT1;5-D* and *HKT1;5-B*. The blue, green and red amplification curves indicate amplifications of *HKT1;5-B* (labeled with FAM dye), *HKT1;5D* (labeled with VIC dye), and the reference dye (ROX), respectively. In both parental genotypes (2x and 4x), a weak amplification of non-target gene was observed: in 2x a weak amplification of *HKT1;5-B*, and in 4x a weak amplification of *HKT1;5-D*. These weak non-target amplifications were unlikely to affect the results because they only constitute small fractions of the total amplified product and therefore have negligible effects on the relative expression ratio of *HKT1;5-D* vs. *HKT1;5-B*.
